# Supplementary material for: Donor/Recipient HLA Molecular Mismatch Scores Predict Primary Humoral and Cellular Alloimmunity in Kidney Transplantation
Source: PubMed Central journal article supplement (PMC7988214; doi:10.3389/fimmu.2020.623276), 2021-03-10
Supplement: DataSheet_1.pdf [file DataSheet_1.pdf]

## Supplementary Material

### Supplementary Figures

#### Supplementary figure 1.

**1.** Peripheral blood mononuclear cell populations before and after T cell enrichment. Representative FACS plot gating strategy used to characterize the PBMC population (**1a**) and after T cell Enrichment (**1b**). **1c.** Variation in % of CD3+CD14-CD19- cells:  $65.68 \pm 9.0$  vs  $87.9 \pm 5.7$  in all PBMCs and T cell Enrichment samples respectively,  $p < 0.001$ . Results from 25 independent experiments. **1d.** Variation in % of the other cells assessed: CD14+:  $9.44 \pm 3.7$  vs  $2.5 \pm 1.9$ ,  $p = 0.002$ ; CD19+CD14-:  $2.08 \pm 0.84$  vs  $0.96 \pm 0.3$ ,  $p = 0.04$ ; CD56+ CD14- CD3-CD19-:  $8.68 \pm 6.8$  vs  $3.85 \pm 3.7$ ,  $p = 0.03$ ; HLADR+CD14-CD19-CD3-CD56-:  $1.65 \pm 0.5$  vs  $0.87 \pm 0.3$ ,  $p = 0.03$  in All PBMCs and T cell

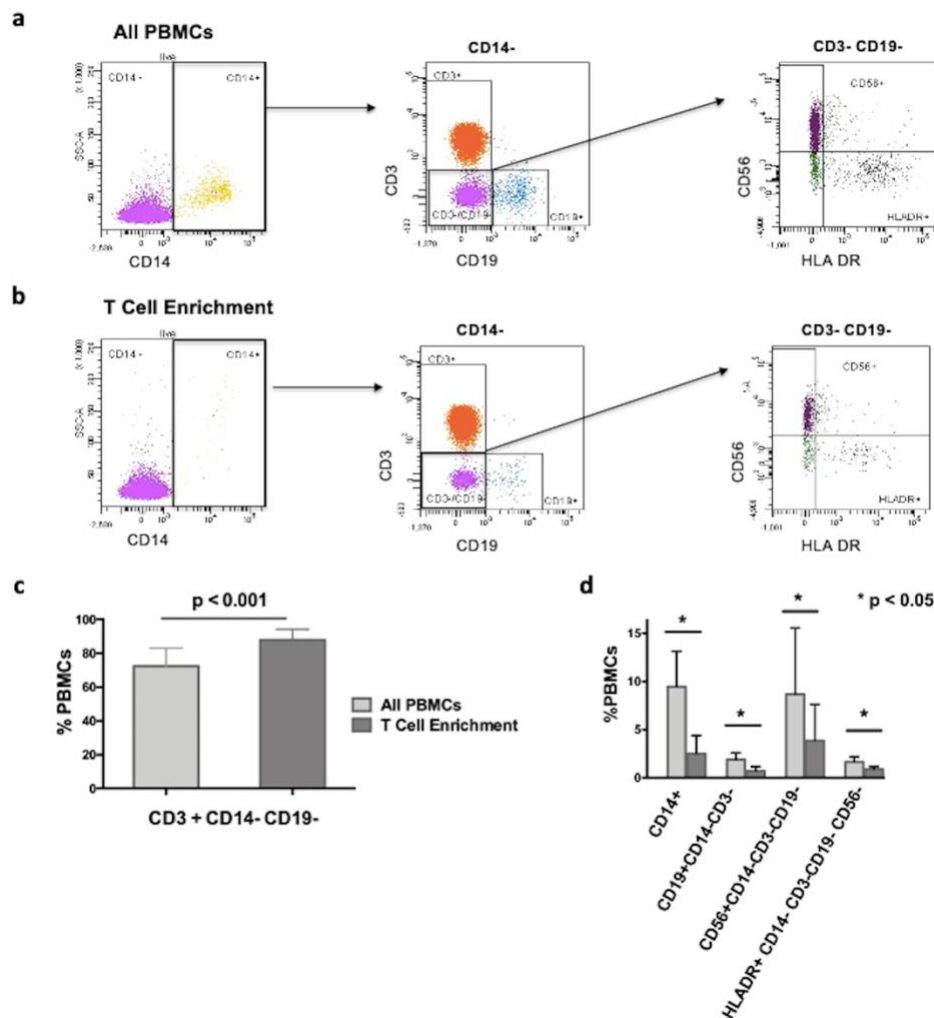

Abbreviations: PBMC: Peripheral blood mononuclear cell

**Supplementary figure 2.** Association between HLA allelic MM, amino acidic MM, Eplet MM load and PIRCHE-II scores

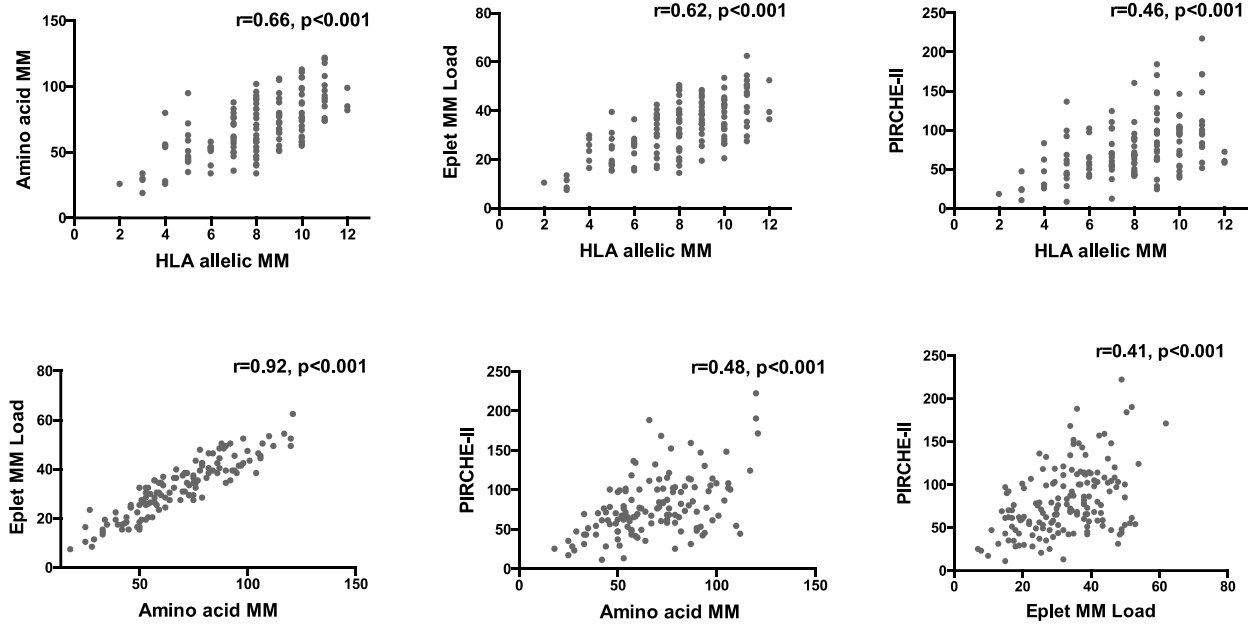

Abbreviations: MM: mismatches

**Supplemental figure 3. Pretransplant DST and risk of BPAR**

Kaplan–Meier curves illustrating the cumulative incidence of BPAR (3a), TCMR (3b) and ABMR (3c) stratified according to pretransplant DST.

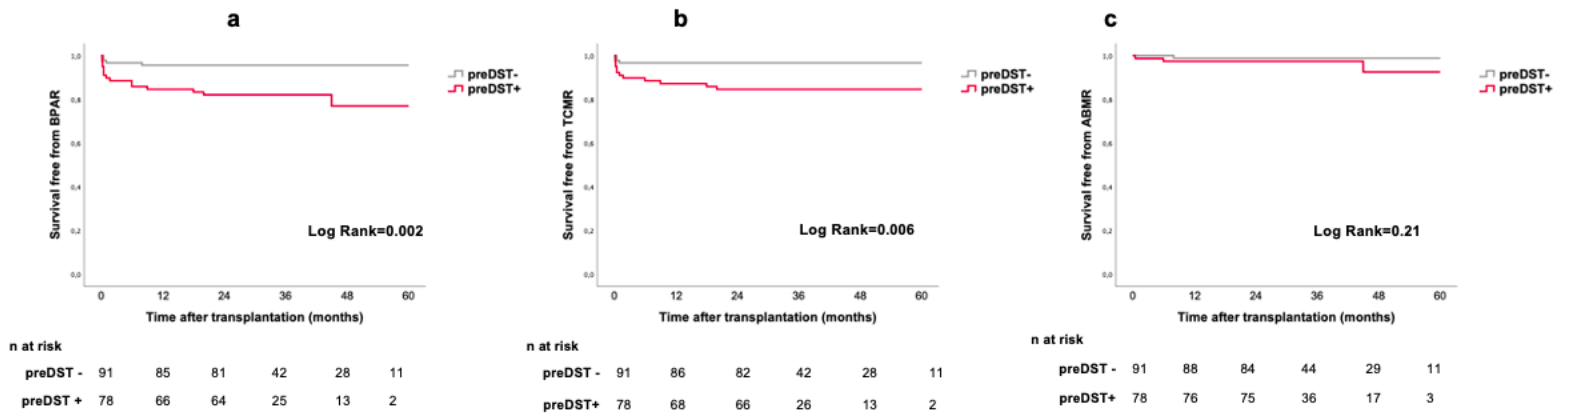

Abbreviations: BPAR: biopsy-proven acute rejection; TCMR: T-cell mediated rejection; ABMR: antibody-mediated rejection; preDST: pretransplant donor-specific T-cell alloimmune response

**Supplementary figure 4.** Relationship between PIRCHE-II score and dnDST for different peptide affinity thresholds.

Relation between PIRCHE-II and dnDST at different IC<sub>50</sub> thresholds. IC<sub>50</sub> 0-50: 8.76±9.4 vs 12.6±13.9, p=0.11; IC<sub>50</sub> 0-125: 19.2±15 vs 27.6±23.6, p=0.04; IC<sub>50</sub> 250-1000: 51.07±20.5 vs 64±26.1, p=0.01 for DST- and dnDST, respectively.

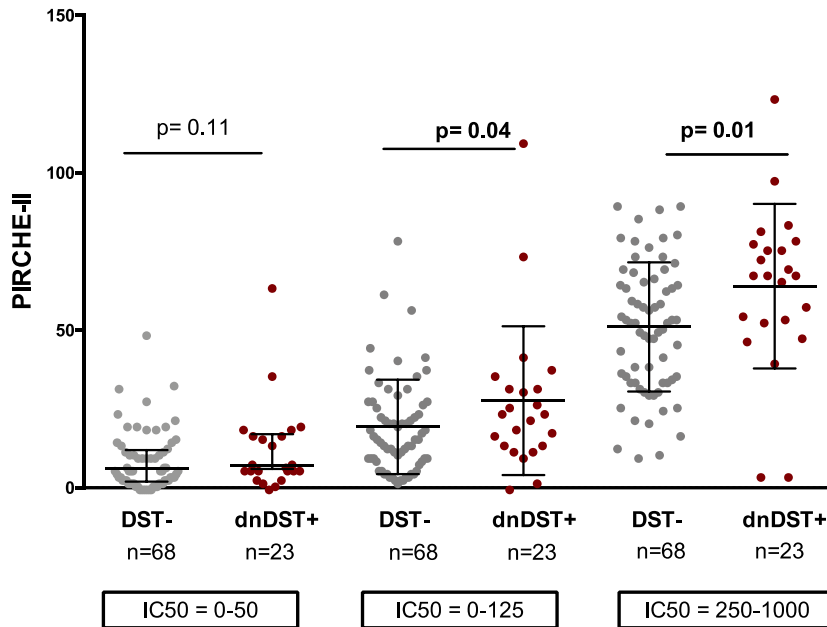

Abbreviations: DST: donor-specific; dnDST *de novo* donor-specific T-cell alloimmune response

**Supplemental figure 5.** Representative FACS plot gating strategy for negative control, Allo DST negative test, pretransplant DST positive test and *de novo* posttransplant DST test.

AIM+ Cells were defined as % of living cells expressing CD69 and CD137 for CD8+T cells and CD134-OX40 and CD137 for CD4+T cells, respectively. All results are expressed subtracting the percentage of AIM+ cells after stimulation with medium (negative control) from % of AIM+ cells after allogenic stimulation

**5a.** Negative control (medium): median 0.02 [0.012-0.076] for CD4+AIM+ and 0.45 [0.29-0.96] for CD8+AIM+.

**5b.** Allo DST negative test: median 0.08% [0.008-0.19] for CD4+AIM+ and 0.17% [0.05-0.42] for CD8+AIM+

**5c.** pre transplant DST positive test: median 0.25% [0.14-0.62] for CD4+AIM+ and 1.2% [0.65-3.55] of CD8+AIM+

**5d.** *de novo* posttransplant DST test: median 0.4% [0.14-0.53] for CD4+AIM+ and 0.60% [0.25-1.2] for CD8+AIM+.

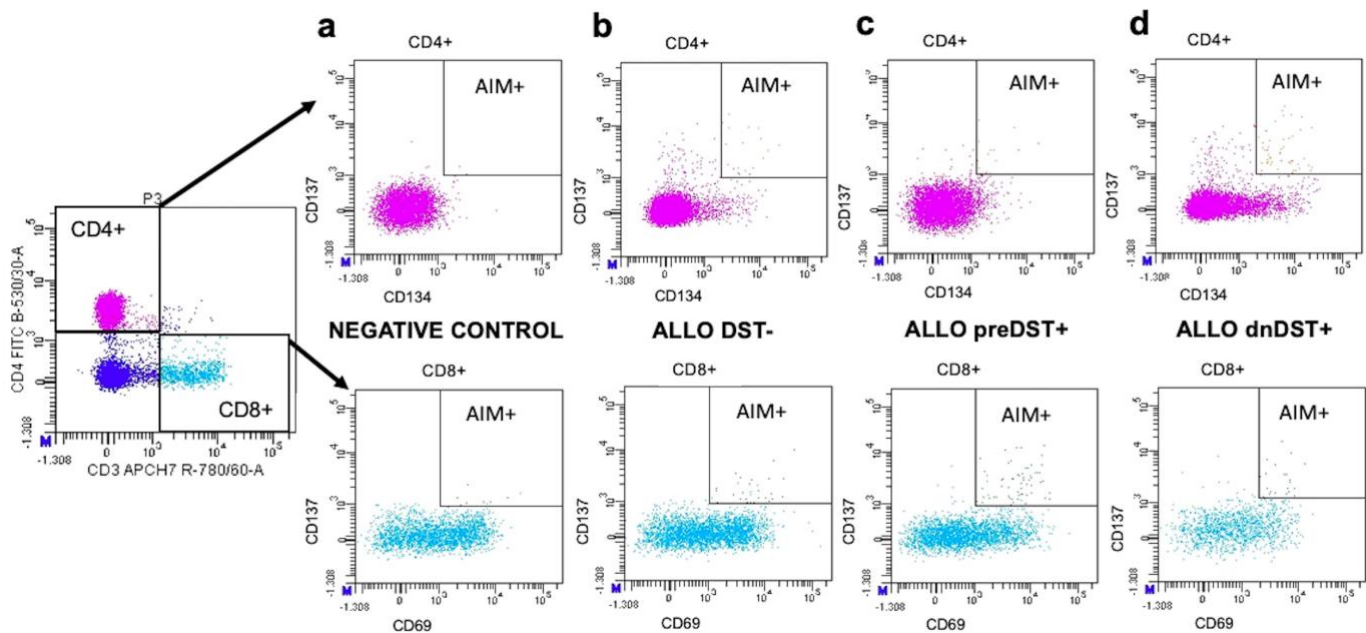

Abbreviations: AIM: T-cell receptor dependent activation-induced cell markers (AIM); DST: donor-specific T-cell alloimmune response; preDST: pretransplant donor-specific T-cell alloimmune response; dnDST *de novo* donor-specific T-cell alloimmune response

## Supplementary Tables

**Supplementary table 1.** Donor/recipient HLA allelic, amino acidic MM, HLAMatchmaker Eplet and PIRCHE-II of all patients of the study.

| <b>Donor/Recipient HLA MM scores</b>                          | <b>All patients<br/>N=169</b> |
|---------------------------------------------------------------|-------------------------------|
| <b>HLA allelic MM</b>                                         | 8 (7-10)                      |
| Class I (A, B, C)                                             | 4 (3-5)                       |
| Class II (DRB1, DQB1; DPB1)                                   | 4 (3-5)                       |
| <b>Amino acidic HLA MM / Solvent accessible</b>               | 69.5 (51-87)                  |
| A                                                             | 15 (7,5-23) / 11 (5-17)       |
| B                                                             | 14 (9-18) / 6 (4-9)           |
| C                                                             | 11 (6-15) / 6 (2-9)           |
| DRB1                                                          | 11 (4-17) / 8 (3-14)          |
| DQB1                                                          | 12 (3-18) / 8 (2-13)          |
| DPB1                                                          | 4 (1-10.25) / 2 (1-7)         |
| <b>Eplet MM Load / Antibody verified</b>                      | 33 (24-40)                    |
| Eplet Class I (A+B+C)                                         | 15 (11-19) / 9 (6-11)         |
| Eplet Class II                                                | 19 (11-25) / 7 (4-9)          |
| Eplet DRB1                                                    | 8 (3-12) / 3 (1-5)            |
| Eplet DQB1                                                    | 7 (2-10) / 2 (1-4)            |
| Eplet DPB1                                                    | 2 (1-5) / 1 (0-2)             |
| <b>PIRCHE-II score (<i>originated peptides per locus</i>)</b> | 71 (51-102)                   |
| PIRCHE-II A                                                   | 14 (6-25)                     |
| PIRCHE-II B                                                   | 14 (6-25)                     |
| PIRCHE-II C                                                   | 12 (8-22)                     |
| PIRCHE-II DRB1                                                | 10 (4-16)                     |
| PIRCHE-II DQB1                                                | 17 (7-26)                     |
| PIRCHE-II DPB1                                                | 3 (0-7)                       |

Data are median (Inter-quartile Range: IQR).

Abbreviations: MM: mismatch

**Supplementary table 2. Comparison of main baseline characteristics and clinical outcomes according to pretransplant DST.**

| Main baseline characteristics             | preDST-<br>(n= 91) | preDST+<br>(n=78) | P value      |
|-------------------------------------------|--------------------|-------------------|--------------|
| Recipient age (Years)                     | 51.5±14            | 51.9±14           | 0.84         |
| Recipient gender (Male)                   | 60 (66)            | 50 (64)           | 0.80         |
| Race (Caucasic)                           | 86 (95)            | 72 (92)           | 0.56         |
| Cause of End Stage disease                |                    |                   | 0.77         |
| <i>Vascular</i>                           | 10 (11)            | 10 (13)           |              |
| <i>Diabetes</i>                           | 4 (4)              | 4 (5)             |              |
| <i>Glomerular</i>                         | 28(31)             | 20 (26)           |              |
| <i>Polycystic Kidney disease</i>          | 15 (16)            | 8 (10)            |              |
| <i>Interstitial disease</i>               | 12 (13)            | 12 (15)           |              |
| <i>Others/unknown</i>                     | 22 (24)            | 24 (31)           |              |
| Time on dialysis (months)                 | 26.32±35           | 24.19±33          | 0.69         |
| Transplant type (deceased)                | 59 (65)            | 56 (72)           | 0.33         |
| Transplant number (1)                     | 83 (91)            | 69 (88)           | 0.55         |
| Cold ischemia time (Hours)                | 12.34±10           | 13.25±9.4         | 0.55         |
| Pre-transplant anti-HLA antibodies (cPRA) |                    |                   |              |
| - Class I                                 | 10 (12)            | 7 (9)             | 0.51         |
| - Class II                                | 22 (27)            | 16 (21)           | 0.35         |
| <b>Main Clinical Outcomes</b>             |                    |                   |              |
| DGF                                       | 22 (24)            | 24 (31)           | 0.36         |
| BPAR                                      | 4 (4)              | 15 (19)           | <b>0.002</b> |
| TCMR                                      | 3                  | 12                | <b>0.006</b> |
| ABMR                                      | 1                  | 3                 | 0.24         |
| <i>De novo</i> DSA                        | 13 (14)            | 11 (14)           |              |
| HLA Class I                               | 3 (23)             | 3 (27)            | 0.97         |
| HLA Class II                              | 11 (85)            | 8 (73)            |              |
| HLA Class I&II                            | 0                  | 1 (9)             |              |
| eGFR (ml/min/1.73m <sup>2</sup> )         |                    |                   |              |
| 12 months (n=160)                         | 54.52±17.7         | 55.31±18.7        | 0.77         |
| 24 months (n=157)                         | 53.38±17.7         | 52.49±19.0        | 0.76         |
| 36 months (n=146)                         | 52.32±19.2         | 50.73±17.3        | 0.60         |
| Death-censored graft loss                 | 5 (6)              | 4 (5)             | 0.87         |
| Patient death                             | 7 (8)              | 4 (5)             | 0.50         |

Abbreviations: cPRA: calculated panel of reactive antibodies; rATG: rabbit anti thymoglobulin; CNI: Calcineurin inhibitor; DGF: delayed graft function; eGFR: estimated glomerular filtrate rate (CKD-EPI); BPAR: Biopsy-proven acute rejection; TCMR: T cell mediated rejection; ABMR: antibody-mediated rejection; DSA: donor-specific antibodies.

**Supplementary table 3.** DST frequencies primed by the direct and indirect pathway of antigen presentation

|                    | Global postDST | Frequencies of DP_DST | Frequencies of IP_DST | Presence of IP | HLA allelic MM | Amino acid MM | Eplet MM Load | Global PIRCHE-II |
|--------------------|----------------|-----------------------|-----------------------|----------------|----------------|---------------|---------------|------------------|
| <b>preDST+</b>     |                |                       |                       |                |                |               |               |                  |
| 1                  | 108            | 80                    | 28                    | Yes            | 8              | 50            | 32            | 46               |
| 2                  | 85             | 50                    | 35                    | Yes            | 6              | 25            | 37            | 141              |
| 3                  | 69             | 78                    | 0                     | No             | 6              | 60            | 33            | 41               |
| 4                  | 32             | 32                    | 0                     | No             | 9              | 51            | 19            | 26               |
| 5                  | 36             | 40                    | 0                     | No             | 7              | 79            | 42            | 57               |
| 6                  | 31             | 35                    | 0                     | No             | 7              | 87            | 40            | 112              |
| 7                  | 234            | 234                   | 0                     | No             | 8              | 59            | 23            | 30               |
| 8                  | 95             | 100                   | 0                     | No             | 8              | 40            | 8             | 69               |
| 9                  | 26             | 30                    | 0                     | No             | 4              | 55            | 17            | 65               |
| <b>dnDST+</b>      |                |                       |                       |                |                |               |               |                  |
| 1                  | 54             | 35                    | 20                    | Yes            | 7              | 46            | 25            | 55               |
| 2                  | 68             | 6                     | 60                    | Yes            | 8              | 89            | 48            | 102              |
| 3                  | 52             | 40                    | 12                    | Yes            | 9              | 63            | 36            | 187              |
| 4                  | 91             | 70                    | 21                    | Yes            | 8              | 51            | 29            | 102              |
| 5                  | 250            | 30                    | 200                   | Yes            | 7              | 71            | 38            | 112              |
| 6                  | 45             | 65                    | 0                     | No             | 6              | 41            | 28            | 55               |
| 7                  | 41,5           | 45                    | 0                     | No             | 5              | 42            | 15            | 10               |
| 8                  | 79,3           | 80                    | 0                     | No             | 7              | 52            | 29            | 100              |
| 9                  | 33             | 33                    | 0                     | No             | 8              | 92            | 50            | 52               |
| <b>persistDST+</b> |                |                       |                       |                |                |               |               |                  |
| 1                  | 44             | 35                    | 10                    | Yes            | 9              | 51            | 19            | 26               |
| 2                  | 53             | 19,5                  | 30                    | Yes            | 10             | 57            | 28            | 53               |
| 3                  | 80,5           | 38                    | 40                    | Yes            | 9              | 104           | 38            | 85               |
| 4                  | 65             | 45                    | 20                    | Yes            | 8              | 50            | 32            | 46               |
| 5                  | 79             | 51                    | 30                    | Yes            | 8              | 40            | 8             | 69               |
| 6                  | 71             | 80                    | 0                     | No             | 10             | 61            | 33            | 67               |
| 7                  | 60,8           | 70                    | 0                     | No             | 6              | 58            | 33            | 41               |
| 8                  | 36             | 55                    | 0                     | No             | 7              | 79            | 42            | 57               |
| 9                  | 234            | 230                   | 0                     | No             | 8              | 59            | 23            | 30               |

Abbreviations: DST: donor specific T cell alloreactivity (DP\_DST: direct pathway; IP\_DST indirect pathway; postDST: post-transplant DST; dnDST: *de novo* DST; persistDST: persistent DST). MM: mismatch
